# Supplementary material for: Loss of Baiap2l2 destabilizes the transducing stereocilia of cochlear hair cells and leads to deafness
Source: PubMed Central journal article supplement (PMC7898316; doi:10.1113/jp280670), 2020-11-26
Supplement: TJP-599-1173-s001.pdf [file TJP-599-1173-s001.pdf]

# The Journal of Physiology Statistical Summary Document

**Manuscript Title:** Loss of *Baiap2l2* destabilizes the transducing stereocilia of cochlear hair cells and leads to deafness

**Authors:** Adam J. Carlton, Julia Halford, Anna Underhill, Jing-Yi Jeng, Matthew R. Avenarius, Merle L. Gilbert, Federico Ceriani, Kimimuepigha Ebisine, Steve D. M. Brown, Michael R. Bowl, Peter G. Barr-Gillespie, Walter Marcotti

**Animal model used, if applicable:**

Mouse— *Baiap2l2*<sup>tm1b/+</sup>, *Baiap2l2*<sup>tm1b/tm1b</sup>, *Baiap2l2*<sup>Δ16/Δ16</sup>, *Baiap2l2*<sup>+/<sup>Δ16</sup></sup> and *Baiap2l2*<sup>+/+</sup>

**Underlying hypothesis:**

This study investigates the hypothesis that the loss of BAIAP2L2 causes defects in stereocilia and leads to deafness.

**Definitions of ‘n’:**

Question 1-5: n = number of animals

Question 6-9: n = number of stereocilia

Question 10-17: n = number of cells

**Mice were from both sexes unless otherwise stated**

**Statistical summary table:**

| Experimental question number*  | Finding/conclusion                                                                          | Experimental location/ variable e.g. cortex vs cerebellum or genotype         | Mean or Median value | SD or MAD | n (value) | P        | Units | Data comparisons e.g. WT vs KO | Statistical test | Any other variable e.g. subjects' age or sex | Figure/table in which data are presented | Comments e.g. observation |
|--------------------------------|---------------------------------------------------------------------------------------------|-------------------------------------------------------------------------------|----------------------|-----------|-----------|----------|-------|--------------------------------|------------------|----------------------------------------------|------------------------------------------|---------------------------|
| 1. Click-evoked ABR thresholds | No ABR threshold difference in <i>Baiap2l2</i> <sup>tm1b/+</sup> from between P19 and P245. | <i>Baiap2l2</i> <sup>tm1b/+</sup> P14                                         | 61.67                | 2.58      | 6         | < 0.0001 | dB    | All ages                       | 1-way ANOVA      | 14-245 days                                  | 2A                                       |                           |
|                                |                                                                                             | <i>Baiap2l2</i> <sup>tm1b/+</sup> P19-22                                      | 42.50                | 1.14      | 14        |          |       |                                |                  |                                              |                                          |                           |
|                                |                                                                                             | <i>Baiap2l2</i> <sup>tm1b/+</sup> P48-53                                      | 40.63                | 3.20      | 8         |          |       |                                |                  |                                              |                                          |                           |
|                                |                                                                                             | <i>Baiap2l2</i> <sup>tm1b/+</sup> P104-116                                    | 39.00                | 2.24      | 6         |          |       |                                |                  |                                              |                                          |                           |
|                                |                                                                                             | <i>Baiap2l2</i> <sup>tm1b/+</sup> P166-245                                    | 39.17                | 2.04      | 6         |          |       |                                |                  |                                              |                                          |                           |
|                                |                                                                                             | Statistical tests for the above data from <i>Baiap2l2</i> <sup>tm1b/+</sup> . |                      |           |           |          |       | 0.1357                         |                  | All ages above P19                           | 1-way ANOVA                              |                           |

The Journal of  
**Physiology** Statistical Summary Document

|                             |                                                 |                                                                                                                       |        |      |    |          |     |                |                                |          |        |  |
|-----------------------------|-------------------------------------------------|-----------------------------------------------------------------------------------------------------------------------|--------|------|----|----------|-----|----------------|--------------------------------|----------|--------|--|
|                             |                                                 |                                                                                                                       |        |      |    | < 0.0001 |     | P14 vs. P19-22 | 1-way ANOVA, Tukey's post-test |          |        |  |
|                             |                                                 | <i>Baiap2l2<sup>tm1b/tm1b</sup></i> P14                                                                               | 85.56  | 6.35 | 9  |          |     |                |                                |          |        |  |
|                             |                                                 | <i>Baiap2l2<sup>tm1b/tm1b</sup></i> P19-22                                                                            | 69.64  | 1.23 | 14 |          |     |                |                                |          |        |  |
|                             |                                                 | <i>Baiap2l2<sup>tm1b/tm1b</sup></i> P48-53                                                                            | 80.00  | 6.45 | 7  | < 0.0001 | dB  | All ages       | 1-way ANOVA                    | P14-P245 |        |  |
|                             |                                                 | <i>Baiap2l2<sup>tm1b/tm1b</sup></i> P104-116                                                                          | 95.83  | 4.92 | 6  |          |     |                |                                |          |        |  |
|                             |                                                 | <i>Baiap2l2<sup>tm1b/tm1b</sup></i> P166-245                                                                          | 100.00 | 0.00 | 6  |          |     |                |                                |          |        |  |
|                             |                                                 | Statistical tests for the above data from <i>Baiap2l2<sup>tm1b/tm1b</sup></i>                                         |        |      |    | < 0.0001 |     | P14 vs. P19-22 | 1-way ANOVA, Tukey's post-test |          |        |  |
|                             |                                                 |                                                                                                                       |        |      |    | 0.2185   |     | P14 vs. P48-61 |                                |          |        |  |
|                             |                                                 | Statistical tests for the above data from <i>Baiap2l2<sup>tm1b/tm1b</sup></i> and <i>Baiap2l2<sup>tm1b/tm1b</sup></i> |        |      |    | < 0.0001 |     | All ages       | 2-way ANOVA                    |          |        |  |
| 2. Pure-tone ABR thresholds | Elevated in <i>Baiap2l2<sup>tm1b/tm1b</sup></i> | <i>Baiap2l2<sup>tm1b/+</sup></i> 3 kHz                                                                                | 86.67  | 2.58 | 6  |          |     |                |                                |          |        |  |
|                             |                                                 | <i>Baiap2l2<sup>tm1b/+</sup></i> 6 kHz                                                                                | 75.00  | 3.16 | 6  |          |     |                |                                |          |        |  |
|                             |                                                 | <i>Baiap2l2<sup>tm1b/+</sup></i> 12 kHz                                                                               | 45.00  | 6.32 | 6  |          |     |                |                                |          |        |  |
|                             |                                                 | <i>Baiap2l2<sup>tm1b/+</sup></i> 18 kHz                                                                               | 37.50  | 6.89 | 6  |          |     |                |                                |          |        |  |
|                             |                                                 | <i>Baiap2l2<sup>tm1b/+</sup></i> 24 kHz                                                                               | 35.00  | 6.12 | 5  |          |     |                |                                |          |        |  |
|                             |                                                 | <i>Baiap2l2<sup>tm1b/+</sup></i> 30 kHz                                                                               | 48.00  | 6.71 | 5  |          |     |                |                                |          |        |  |
|                             |                                                 |                                                                                                                       |        |      |    | dB       | P14 |                |                                | P14-P245 | 2B, 2C |  |

The Journal of  
**Physiology** Statistical Summary Document

|  |  |                                            |       |      |    |  |  |  |  |  |  |  |
|--|--|--------------------------------------------|-------|------|----|--|--|--|--|--|--|--|
|  |  | <i>Baiap2l2<sup>tm1b/+</sup></i><br>36 kHz | 67.00 | 7.58 | 5  |  |  |  |  |  |  |  |
|  |  | <i>Baiap2l2<sup>tm1b/+</sup></i><br>3 kHz  | 80.71 | 1.37 | 14 |  |  |  |  |  |  |  |
|  |  | <i>Baiap2l2<sup>tm1b/+</sup></i><br>6 kHz  | 46.79 | 0.66 | 14 |  |  |  |  |  |  |  |
|  |  | <i>Baiap2l2<sup>tm1b/+</sup></i><br>12 kHz | 23.93 | 1.30 | 14 |  |  |  |  |  |  |  |
|  |  | <i>Baiap2l2<sup>tm1b/+</sup></i><br>18 kHz | 24.29 | 1.16 | 14 |  |  |  |  |  |  |  |
|  |  | <i>Baiap2l2<sup>tm1b/+</sup></i><br>24 kHz | 30.00 | 1.05 | 14 |  |  |  |  |  |  |  |
|  |  | <i>Baiap2l2<sup>tm1b/+</sup></i><br>30 kHz | 36.43 | 0.82 | 14 |  |  |  |  |  |  |  |
|  |  | <i>Baiap2l2<sup>tm1b/+</sup></i><br>36 kHz | 44.29 | 1.03 | 14 |  |  |  |  |  |  |  |
|  |  | <i>Baiap2l2<sup>tm1b/+</sup></i><br>3 kHz  | 70.00 | 6.55 | 8  |  |  |  |  |  |  |  |
|  |  | <i>Baiap2l2<sup>tm1b/+</sup></i><br>6 kHz  | 38.13 | 2.59 | 8  |  |  |  |  |  |  |  |
|  |  | <i>Baiap2l2<sup>tm1b/+</sup></i><br>12 kHz | 21.25 | 3.54 | 8  |  |  |  |  |  |  |  |
|  |  | <i>Baiap2l2<sup>tm1b/+</sup></i><br>18 kHz | 24.38 | 4.17 | 8  |  |  |  |  |  |  |  |
|  |  | <i>Baiap2l2<sup>tm1b/+</sup></i><br>24 kHz | 35.00 | 4.63 | 8  |  |  |  |  |  |  |  |
|  |  | <i>Baiap2l2<sup>tm1b/+</sup></i><br>30 kHz | 50.71 | 6.73 | 7  |  |  |  |  |  |  |  |
|  |  | <i>Baiap2l2<sup>tm1b/+</sup></i><br>36 kHz | 86.43 | 9.00 | 7  |  |  |  |  |  |  |  |
|  |  | <i>Baiap2l2<sup>tm1b/+</sup></i><br>3 kHz  | 39.00 | 2.24 | 5  |  |  |  |  |  |  |  |
|  |  | <i>Baiap2l2<sup>tm1b/+</sup></i><br>3 kHz  | 62.00 | 5.70 | 5  |  |  |  |  |  |  |  |



The Journal of  
**Physiology** Statistical Summary Document

|  |  |                                               |        |       |    |  |  |        |  |  |  |
|--|--|-----------------------------------------------|--------|-------|----|--|--|--------|--|--|--|
|  |  | <i>Baiap2l2<sup>tm1b/tm1b</sup></i><br>24 kHz | 66.11  | 11.40 | 9  |  |  |        |  |  |  |
|  |  | <i>Baiap2l2<sup>tm1b/tm1b</sup></i><br>30 kHz | 83.89  | 11.67 | 9  |  |  |        |  |  |  |
|  |  | <i>Baiap2l2<sup>tm1b/tm1b</sup></i><br>36 kHz | 97.22  | 2.64  | 9  |  |  |        |  |  |  |
|  |  | <i>Baiap2l2<sup>tm1b/tm1b</sup></i><br>3 kHz  | 85.00  | 1.48  | 14 |  |  |        |  |  |  |
|  |  | <i>Baiap2l2<sup>tm1b/tm1b</sup></i><br>6 kHz  | 60.00  | 1.39  | 14 |  |  |        |  |  |  |
|  |  | <i>Baiap2l2<sup>tm1b/tm1b</sup></i><br>12 kHz | 52.50  | 2.95  | 14 |  |  |        |  |  |  |
|  |  | <i>Baiap2l2<sup>tm1b/tm1b</sup></i><br>18 kHz | 68.21  | 2.20  | 14 |  |  |        |  |  |  |
|  |  | <i>Baiap2l2<sup>tm1b/tm1b</sup></i><br>24 kHz | 78.93  | 1.30  | 14 |  |  |        |  |  |  |
|  |  | <i>Baiap2l2<sup>tm1b/tm1b</sup></i><br>30 kHz | 86.79  | 1.00  | 14 |  |  |        |  |  |  |
|  |  | <i>Baiap2l2<sup>tm1b/tm1b</sup></i><br>36 kHz | 93.57  | 0.82  | 14 |  |  |        |  |  |  |
|  |  | <i>Baiap2l2<sup>tm1b/tm1b</sup></i><br>3 kHz  | 80.71  | 3.45  | 7  |  |  |        |  |  |  |
|  |  | <i>Baiap2l2<sup>tm1b/tm1b</sup></i><br>6 kHz  | 65.00  | 8.16  | 7  |  |  |        |  |  |  |
|  |  | <i>Baiap2l2<sup>tm1b/tm1b</sup></i><br>12 kHz | 62.86  | 11.85 | 7  |  |  |        |  |  |  |
|  |  | <i>Baiap2l2<sup>tm1b/tm1b</sup></i><br>18 kHz | 80.71  | 10.97 | 7  |  |  |        |  |  |  |
|  |  | <i>Baiap2l2<sup>tm1b/tm1b</sup></i><br>24 kHz | 96.43  | 5.56  | 7  |  |  |        |  |  |  |
|  |  | <i>Baiap2l2<sup>tm1b/tm1b</sup></i><br>30 kHz | 100.00 | 0.00  | 7  |  |  |        |  |  |  |
|  |  | <i>Baiap2l2<sup>tm1b/tm1b</sup></i><br>36 kHz | 100.00 | 0.00  | 7  |  |  |        |  |  |  |
|  |  |                                               |        |       |    |  |  | P19-22 |  |  |  |
|  |  |                                               |        |       |    |  |  | P48-53 |  |  |  |

The Journal of  
**Physiology** Statistical Summary Document

|  |                                      |        |      |   |          |          |                                                                                   |             |  |  |
|--|--------------------------------------|--------|------|---|----------|----------|-----------------------------------------------------------------------------------|-------------|--|--|
|  | 36 kHz                               |        |      |   |          |          |                                                                                   |             |  |  |
|  | <i>Baiap2l2</i> <sup>tm1b/tm1b</sup> | 88.33  | 5.16 | 6 |          | P104-116 |                                                                                   |             |  |  |
|  | 3 kHz                                |        |      |   |          |          |                                                                                   |             |  |  |
|  | <i>Baiap2l2</i> <sup>tm1b/tm1b</sup> | 80.00  | 6.32 | 6 |          |          |                                                                                   |             |  |  |
|  | 6 kHz                                |        |      |   |          |          |                                                                                   |             |  |  |
|  | <i>Baiap2l2</i> <sup>tm1b/tm1b</sup> | 88.33  | 10.3 | 6 |          |          |                                                                                   |             |  |  |
|  | 12 kHz                               |        |      |   |          |          |                                                                                   |             |  |  |
|  | <i>Baiap2l2</i> <sup>tm1b/tm1b</sup> | 100.00 | 0.00 | 6 |          |          |                                                                                   |             |  |  |
|  | 18 kHz                               |        |      |   |          |          |                                                                                   |             |  |  |
|  | <i>Baiap2l2</i> <sup>tm1b/tm1b</sup> | 100.00 | 0.00 | 6 |          | P166-245 |                                                                                   |             |  |  |
|  | 24 kHz                               |        |      |   |          |          |                                                                                   |             |  |  |
|  | <i>Baiap2l2</i> <sup>tm1b/tm1b</sup> | 100.00 | 0.00 | 6 |          |          |                                                                                   |             |  |  |
|  | 30 kHz                               |        |      |   |          |          |                                                                                   |             |  |  |
|  | <i>Baiap2l2</i> <sup>tm1b/tm1b</sup> | 100.00 | 0.00 | 6 |          |          |                                                                                   |             |  |  |
|  | 36 kHz                               |        |      |   |          |          |                                                                                   |             |  |  |
|  | <i>Baiap2l2</i> <sup>tm1b/tm1b</sup> | 100.00 | 0.00 | 6 |          |          |                                                                                   |             |  |  |
|  | 3 kHz                                |        |      |   |          |          |                                                                                   |             |  |  |
|  | <i>Baiap2l2</i> <sup>tm1b/tm1b</sup> | 100.00 | 0.00 | 6 |          |          |                                                                                   |             |  |  |
|  | 6 kHz                                |        |      |   |          |          |                                                                                   |             |  |  |
|  | <i>Baiap2l2</i> <sup>tm1b/tm1b</sup> | 100.00 | 0.00 | 6 |          |          |                                                                                   |             |  |  |
|  | 12 kHz                               |        |      |   |          |          |                                                                                   |             |  |  |
|  | <i>Baiap2l2</i> <sup>tm1b/tm1b</sup> | 100.00 | 0.00 | 6 |          |          |                                                                                   |             |  |  |
|  | 18 kHz                               |        |      |   |          |          |                                                                                   |             |  |  |
|  | <i>Baiap2l2</i> <sup>tm1b/tm1b</sup> | 100.00 | 0.00 | 6 |          |          |                                                                                   |             |  |  |
|  | 24 kHz                               |        |      |   |          |          |                                                                                   |             |  |  |
|  | <i>Baiap2l2</i> <sup>tm1b/tm1b</sup> | 100.00 | 0.00 | 6 |          |          |                                                                                   |             |  |  |
|  | 30 kHz                               |        |      |   |          |          |                                                                                   |             |  |  |
|  | <i>Baiap2l2</i> <sup>tm1b/tm1b</sup> | 100.00 | 0.00 | 6 |          |          |                                                                                   |             |  |  |
|  | 36 kHz                               |        |      |   |          |          |                                                                                   |             |  |  |
|  | Statistical tests for the above data |        |      |   | < 0.0001 |          | <i>Baiap2l2</i> <sup>tm1b/+</sup> vs. <i>Baiap2l2</i> <sup>tm1b/tm1b</sup> at P14 | 2-way ANOVA |  |  |

The Journal of  
**Physiology** Statistical Summary Document

|                                                       |                                                                                                                                 |                                         |          |  |                                                                                            |                      |        |    |  |
|-------------------------------------------------------|---------------------------------------------------------------------------------------------------------------------------------|-----------------------------------------|----------|--|--------------------------------------------------------------------------------------------|----------------------|--------|----|--|
|                                                       |                                                                                                                                 |                                         | < 0.0001 |  | <i>Baiap2l2<sup>tm1b/+</sup></i> vs.<br><i>Baiap2l2<sup>tm1b/tm1b</sup></i> at<br>P19-22   | 2-way<br>ANOVA       |        |    |  |
|                                                       |                                                                                                                                 |                                         | < 0.0001 |  | <i>Baiap2l2<sup>tm1b/+</sup></i> vs.<br><i>Baiap2l2<sup>tm1b/tm1b</sup></i> at<br>P48-53   | 2-way<br>ANOVA       |        |    |  |
|                                                       |                                                                                                                                 |                                         | < 0.0001 |  | <i>Baiap2l2<sup>tm1b/+</sup></i> vs.<br><i>Baiap2l2<sup>tm1b/tm1b</sup></i> at<br>P104-116 | 2-way<br>ANOVA       |        |    |  |
|                                                       |                                                                                                                                 |                                         | < 0.0001 |  | <i>Baiap2l2<sup>tm1b/+</sup></i> vs.<br><i>Baiap2l2<sup>tm1b/tm1b</sup></i> at<br>P166-245 | 2-way<br>ANOVA       |        |    |  |
| 3. Wave 1 amplitude and latency                       | Wave 1 amplitude and latency were different between <i>Baiap2l2<sup>tm1b/tm1b</sup></i> and <i>Baiap2l2<sup>tm1b/tm1b</sup></i> | Wave 1 amplitude.                       | < 0.0001 |  | <i>Baiap2l2<sup>tm1b/+</sup></i> vs.<br><i>Baiap2l2<sup>tm1b/tm1b</sup></i>                | 2-way<br>ANOVA       | P19-53 | 2F |  |
|                                                       |                                                                                                                                 |                                         | < 0.0001 |  | <i>Baiap2l2<sup>tm1b/+</sup></i> vs.<br><i>Baiap2l2<sup>tm1b/tm1b</sup></i>                | 2-way<br>ANOVA,      | P19-22 |    |  |
|                                                       |                                                                                                                                 |                                         | < 0.0001 |  | <i>Baiap2l2<sup>tm1b/+</sup></i> vs.<br><i>Baiap2l2<sup>tm1b/tm1b</sup></i>                | Tukey's<br>post-test | P48-53 |    |  |
|                                                       |                                                                                                                                 | Wave 1 latency.                         | 0.0247   |  | <i>Baiap2l2<sup>tm1b/+</sup></i> vs.<br><i>Baiap2l2<sup>tm1b/tm1b</sup></i>                | 2-way<br>ANOVA       | P19-53 |    |  |
|                                                       |                                                                                                                                 |                                         | < 0.0001 |  | <i>Baiap2l2<sup>tm1b/+</sup></i> vs.<br><i>Baiap2l2<sup>tm1b/tm1b</sup></i>                | 2-way<br>ANOVA,      | P19-22 |    |  |
|                                                       |                                                                                                                                 |                                         | < 0.0001 |  | <i>Baiap2l2<sup>tm1b/+</sup></i> vs.<br><i>Baiap2l2<sup>tm1b/tm1b</sup></i>                | Tukey's<br>post-test | P48-53 |    |  |
| 4. Wave 1 amplitude and latency relative to threshold | Wave 1 amplitude was different between <i>Baiap2l2<sup>tm1b/tm1b</sup></i>                                                      | Wave 1 amplitude relative to threshold. | < 0.0001 |  | <i>Baiap2l2<sup>tm1b/+</sup></i> vs.<br><i>Baiap2l2<sup>tm1b/tm1b</sup></i>                | 2-way<br>ANOVA       | P19-53 | 2G |  |
|                                                       |                                                                                                                                 |                                         | < 0.0001 |  | <i>Baiap2l2<sup>tm1b/+</sup></i> vs.<br><i>Baiap2l2<sup>tm1b/tm1b</sup></i>                | 2-way<br>ANOVA,      | P19-22 |    |  |
|                                                       |                                                                                                                                 |                                         | 0.0468   |  | <i>Baiap2l2<sup>tm1b/+</sup></i> vs.<br><i>Baiap2l2<sup>tm1b/tm1b</sup></i>                | Tukey's<br>post-test | P48-53 |    |  |

The Journal of  
**Physiology** Statistical Summary Document

|                                         | <i>b/tm1b</i> and<br><i>Baiap2l2<sup>tm1</sup><sub>b/tm1b</sub></i>                                                                                              | Wave 1 latency relative to threshold.         |    |    |    | 0.9677   |    | <i>Baiap2l2<sup>tm1b/+</sup></i> vs.<br><i>Baiap2l2<sup>tm1b/tm1b</sup></i> | 2-way<br>ANOVA                                        | P19-53 |      |                                     |
|-----------------------------------------|------------------------------------------------------------------------------------------------------------------------------------------------------------------|-----------------------------------------------|----|----|----|----------|----|-----------------------------------------------------------------------------|-------------------------------------------------------|--------|------|-------------------------------------|
| 5. DPOAE<br>threshold                   | DPOAE<br>thresholds<br>in<br><i>Baiap2l2<sup>tm1</sup><sub>b/tm1b</sub></i> mice<br>were raised<br>compared<br>to<br><i>Baiap2l2<sup>tm1</sup><sub>b/+</sub></i> | <i>Baiap2l2<sup>tm1b/+</sup></i> 6 kHz        | 75 | 5  | 16 | < 0.0001 | dB | <i>Baiap2l2<sup>tm1b/+</sup></i> vs.<br><i>Baiap2l2<sup>tm1b/tm1b</sup></i> | aligned<br>ranks<br>transformati<br>on 2-way<br>ANOVA | P19-61 | 3A,D | Data<br>are<br>median<br>and<br>MAD |
|                                         |                                                                                                                                                                  | <i>Baiap2l2<sup>tm1b/+</sup></i> 12 kHz       | 40 | 0  | 16 |          |    |                                                                             |                                                       |        |      |                                     |
|                                         |                                                                                                                                                                  | <i>Baiap2l2<sup>tm1b/+</sup></i> 18 kHz       | 50 | 10 | 16 |          |    |                                                                             |                                                       |        |      |                                     |
|                                         |                                                                                                                                                                  | <i>Baiap2l2<sup>tm1b/+</sup></i> 24 kHz       | 50 | 10 | 16 |          |    |                                                                             |                                                       |        |      |                                     |
|                                         |                                                                                                                                                                  | <i>Baiap2l2<sup>tm1b/tm1b</sup></i> 6<br>kHz  | 85 | 5  | 18 |          |    |                                                                             |                                                       |        |      |                                     |
|                                         |                                                                                                                                                                  | <i>Baiap2l2<sup>tm1b/tm1b</sup></i> 12<br>kHz | 70 | 10 | 18 |          |    |                                                                             |                                                       |        |      |                                     |
|                                         |                                                                                                                                                                  | <i>Baiap2l2<sup>tm1b/tm1b</sup></i> 18<br>kHz | 80 | 10 | 18 | < 0.0001 |    |                                                                             |                                                       |        |      |                                     |
|                                         |                                                                                                                                                                  | <i>Baiap2l2<sup>tm1b/tm1b</sup></i> 24<br>kHz | 75 | 15 | 18 |          |    |                                                                             |                                                       |        |      |                                     |
|                                         |                                                                                                                                                                  | <i>Baiap2l2<sup>tm1b/+</sup></i> 6 kHz        | 80 | 10 | 5  |          |    |                                                                             |                                                       |        |      |                                     |
|                                         |                                                                                                                                                                  | <i>Baiap2l2<sup>tm1b/+</sup></i> 12 kHz       | 30 | 0  | 5  |          |    |                                                                             |                                                       |        |      |                                     |
|                                         |                                                                                                                                                                  | <i>Baiap2l2<sup>tm1b/+</sup></i> 18 kHz       | 50 | 0  | 5  |          |    |                                                                             |                                                       |        |      |                                     |
|                                         |                                                                                                                                                                  | <i>Baiap2l2<sup>tm1b/+</sup></i> 24 kHz       | 60 | 10 | 5  |          |    |                                                                             |                                                       |        |      |                                     |
|                                         |                                                                                                                                                                  | <i>Baiap2l2<sup>tm1b/tm1b</sup></i> 6<br>kHz  | 90 | 0  | 6  | < 0.0001 |    |                                                                             |                                                       |        |      |                                     |
|                                         |                                                                                                                                                                  | <i>Baiap2l2<sup>tm1b/tm1b</sup></i> 12<br>kHz | 70 | 10 | 6  |          |    |                                                                             |                                                       |        |      |                                     |
|                                         |                                                                                                                                                                  | <i>Baiap2l2<sup>tm1b/tm1b</sup></i> 18<br>kHz | 90 | 0  | 6  |          |    |                                                                             |                                                       |        |      |                                     |
|                                         |                                                                                                                                                                  | <i>Baiap2l2<sup>tm1b/tm1b</sup></i> 24<br>kHz | 90 | 0  | 6  |          |    |                                                                             |                                                       |        |      |                                     |
|                                         |                                                                                                                                                                  | <i>Baiap2l2<sup>tm1b/+</sup></i> 6 kHz        | 70 | 0  | 6  | < 0.0001 |    |                                                                             |                                                       |        |      |                                     |
|                                         |                                                                                                                                                                  | <i>Baiap2l2<sup>tm1b/+</sup></i> 12 kHz       | 40 | 5  | 6  |          |    |                                                                             |                                                       |        |      |                                     |
| <i>Baiap2l2<sup>tm1b/+</sup></i> 18 kHz | 70                                                                                                                                                               | 20                                            | 6  |    |    |          |    |                                                                             |                                                       |        |      |                                     |
|                                         |                                                                                                                                                                  |                                               |    |    |    |          |    |                                                                             | P166-245                                              | 3C,F   |      |                                     |



The Journal of  
**Physiology** Statistical Summary Document

|                                          |                                                          |                                             |      |        |                                                                       |        |    |                                                                         |        |       |    |
|------------------------------------------|----------------------------------------------------------|---------------------------------------------|------|--------|-----------------------------------------------------------------------|--------|----|-------------------------------------------------------------------------|--------|-------|----|
|                                          |                                                          | <i>Baiap2l2</i> <sup>tm1b/+</sup> 24 kHz    | 90   | 0      | 6                                                                     |        |    |                                                                         |        |       |    |
|                                          |                                                          | <i>Baiap2l2</i> <sup>tm1b/tm1b</sup> 6 kHz  | 80   | 10     | 6                                                                     |        |    |                                                                         |        |       |    |
|                                          |                                                          | <i>Baiap2l2</i> <sup>tm1b/tm1b</sup> 12 kHz | 90   | 0      | 6                                                                     |        |    |                                                                         |        |       |    |
|                                          |                                                          | <i>Baiap2l2</i> <sup>tm1b/tm1b</sup> 18 kHz | 90   | 0      | 6                                                                     |        |    |                                                                         |        |       |    |
|                                          |                                                          | <i>Baiap2l2</i> <sup>tm1b/tm1b</sup> 24 kHz | 90   | 0      | 6                                                                     |        |    |                                                                         |        |       |    |
| 6. IHC stereocilia length                | No consistent trend in the direction of the differences. | Row 1 <i>Baiap2l2</i> <sup>Δ16/+</sup>      | 3.20 | 0.35   | 42                                                                    | 0.6481 | μm | <i>Baiap2l2</i> <sup>Δ16/+</sup> vs. <i>Baiap2l2</i> <sup>Δ16/Δ16</sup> | t-test | P0.5  | 7A |
|                                          |                                                          | Row 1 <i>Baiap2l2</i> <sup>Δ16/Δ16</sup>    | 3.25 | 0.35   | 12                                                                    |        |    |                                                                         |        |       |    |
|                                          |                                                          | Row 1 <i>Baiap2l2</i> <sup>Δ16/+</sup>      | 3.14 | 0.43   | 15                                                                    | 0.1571 |    | <i>Baiap2l2</i> <sup>Δ16/+</sup> vs. <i>Baiap2l2</i> <sup>Δ16/Δ16</sup> |        | P3.5  | 7B |
|                                          |                                                          | Row 1 <i>Baiap2l2</i> <sup>Δ16/Δ16</sup>    | 3.33 | 0.46   | 42                                                                    |        |    |                                                                         |        |       |    |
|                                          |                                                          | Row 1 <i>Baiap2l2</i> <sup>+/+</sup>        | 2.84 | 0.24   | 9                                                                     | 0.0705 |    | <i>Baiap2l2</i> <sup>+/+</sup> vs. <i>Baiap2l2</i> <sup>Δ16/Δ16</sup>   |        | P5.5  | 7C |
|                                          |                                                          | Row 1 <i>Baiap2l2</i> <sup>Δ16/Δ16</sup>    | 3.07 | 0.32   | 16                                                                    |        |    |                                                                         |        |       |    |
|                                          |                                                          | Row 1 <i>Baiap2l2</i> <sup>+/+</sup>        | 3.35 | 0.35   | 13                                                                    | 0.0506 |    | <i>Baiap2l2</i> <sup>+/+</sup> vs. <i>Baiap2l2</i> <sup>Δ16/Δ16</sup>   |        | P8.5  | 7D |
|                                          |                                                          | Row 1 <i>Baiap2l2</i> <sup>Δ16/Δ16</sup>    | 3.64 | 0.42   | 15                                                                    |        |    |                                                                         |        |       |    |
|                                          |                                                          | Row 1 <i>Baiap2l2</i> <sup>Δ16/+</sup>      | 6.14 | 0.67   | 4                                                                     | 0.7017 |    | <i>Baiap2l2</i> <sup>Δ16/+</sup> vs. <i>Baiap2l2</i> <sup>Δ16/Δ16</sup> |        | P14.5 | 7E |
|                                          |                                                          | Row 1 <i>Baiap2l2</i> <sup>Δ16/Δ16</sup>    | 6.26 | 0.48   | 12                                                                    |        |    |                                                                         |        |       |    |
|                                          |                                                          | Row 1 <i>Baiap2l2</i> <sup>+/+</sup>        | 6.50 | 0.24   | 9                                                                     | 0.1664 |    | <i>Baiap2l2</i> <sup>+/+</sup> vs. <i>Baiap2l2</i> <sup>Δ16/Δ16</sup>   |        | P21   | 7F |
|                                          |                                                          | Row 1 <i>Baiap2l2</i> <sup>Δ16/Δ16</sup>    | 6.13 | 0.75   | 10                                                                    |        |    |                                                                         |        |       |    |
|                                          |                                                          | Row 2 <i>Baiap2l2</i> <sup>Δ16/+</sup>      | 2.55 | 0.34   | 42                                                                    | 0.7933 |    | <i>Baiap2l2</i> <sup>Δ16/+</sup> vs. <i>Baiap2l2</i> <sup>Δ16/Δ16</sup> |        | P0.5  | 7A |
|                                          |                                                          | Row 2 <i>Baiap2l2</i> <sup>Δ16/Δ16</sup>    | 2.58 | 0.29   | 12                                                                    |        |    |                                                                         |        |       |    |
|                                          |                                                          | Row 2 <i>Baiap2l2</i> <sup>Δ16/+</sup>      | 2.16 | 0.35   | 15                                                                    | 0.2737 |    | <i>Baiap2l2</i> <sup>Δ16/+</sup> vs. <i>Baiap2l2</i> <sup>Δ16/Δ16</sup> |        | P3.5  | 7B |
|                                          |                                                          | Row 2 <i>Baiap2l2</i> <sup>Δ16/Δ16</sup>    | 2.05 | 0.34   | 42                                                                    |        |    |                                                                         |        |       |    |
|                                          |                                                          | Row 2 <i>Baiap2l2</i> <sup>+/+</sup>        | 2.01 | 0.22   | 9                                                                     | 0.3790 |    | <i>Baiap2l2</i> <sup>+/+</sup> vs. <i>Baiap2l2</i> <sup>Δ16/Δ16</sup>   |        | P5.5  | 7C |
|                                          |                                                          | Row 2 <i>Baiap2l2</i> <sup>Δ16/Δ16</sup>    | 1.90 | 0.34   | 16                                                                    |        |    |                                                                         |        |       |    |
| Row 2 <i>Baiap2l2</i> <sup>+/+</sup>     | 2.24                                                     | 0.26                                        | 13   | 0.0003 | <i>Baiap2l2</i> <sup>+/+</sup> vs. <i>Baiap2l2</i> <sup>Δ16/Δ16</sup> | P8.5   | 7D |                                                                         |        |       |    |
| Row 2 <i>Baiap2l2</i> <sup>Δ16/Δ16</sup> | 1.84                                                     | 0.25                                        | 15   |        |                                                                       |        |    |                                                                         |        |       |    |
| Row 2 <i>Baiap2l2</i> <sup>Δ16/+</sup>   | 2.18                                                     | 0.33                                        | 4    | 0.1657 |                                                                       | P14.5  | 7E |                                                                         |        |       |    |

The Journal of  
**Physiology** Statistical Summary Document

|                          |                                                          |                                          |      |      |    |         |        |                                                                            |                                                                            |        |      |      |    |
|--------------------------|----------------------------------------------------------|------------------------------------------|------|------|----|---------|--------|----------------------------------------------------------------------------|----------------------------------------------------------------------------|--------|------|------|----|
|                          |                                                          | Row 2 <i>Baiap2l2</i> <sup>Δ16/Δ16</sup> | 2.41 | 0.26 | 12 |         |        | <i>Baiap2l2</i> <sup>Δ16/+</sup> vs.<br><i>Baiap2l2</i> <sup>Δ16/Δ16</sup> |                                                                            |        |      |      |    |
|                          |                                                          | Row 2 <i>Baiap2l2</i> <sup>+/+</sup>     | 2.27 | 0.27 | 9  | 0.7738  |        | <i>Baiap2l2</i> <sup>+/+</sup> vs.<br><i>Baiap2l2</i> <sup>Δ16/Δ16</sup>   |                                                                            | P21    | 7F   |      |    |
|                          |                                                          | Row 2 <i>Baiap2l2</i> <sup>Δ16/Δ16</sup> | 2.30 | 0.29 | 10 |         |        |                                                                            |                                                                            |        |      |      |    |
| 7. IHC stereocilia width | No consistent trend in the direction of the differences. | Row 1 <i>Baiap2l2</i> <sup>Δ16/+</sup>   | 0.33 | 0.04 | 42 |         | 0.0251 | μm                                                                         | <i>Baiap2l2</i> <sup>Δ16/+</sup> vs.<br><i>Baiap2l2</i> <sup>Δ16/Δ16</sup> | t-test | P0.5 | 7G   |    |
|                          |                                                          | Row 1 <i>Baiap2l2</i> <sup>Δ16/Δ16</sup> | 0.30 | 0.03 | 12 |         |        |                                                                            |                                                                            |        |      | P3.5 | 7H |
|                          |                                                          | Row 1 <i>Baiap2l2</i> <sup>Δ16/+</sup>   | 0.46 | 0.06 | 15 | < 0.001 |        | <i>Baiap2l2</i> <sup>Δ16/+</sup> vs.<br><i>Baiap2l2</i> <sup>Δ16/Δ16</sup> |                                                                            | P5.5   | 7I   |      |    |
|                          |                                                          | Row 1 <i>Baiap2l2</i> <sup>Δ16/Δ16</sup> | 0.56 | 0.06 | 42 |         |        |                                                                            |                                                                            | P8.5   | 7J   |      |    |
|                          |                                                          | Row 1 <i>Baiap2l2</i> <sup>+/+</sup>     | 0.43 | 0.02 | 9  | < 0.001 |        | <i>Baiap2l2</i> <sup>+/+</sup> vs.<br><i>Baiap2l2</i> <sup>Δ16/Δ16</sup>   |                                                                            | P14.5  | 7K   |      |    |
|                          |                                                          | Row 1 <i>Baiap2l2</i> <sup>Δ16/Δ16</sup> | 0.58 | 0.07 | 16 |         |        |                                                                            |                                                                            | P21    | 7L   |      |    |
|                          |                                                          | Row 1 <i>Baiap2l2</i> <sup>+/+</sup>     | 0.64 | 0.06 | 13 | 0.1010  |        | <i>Baiap2l2</i> <sup>+/+</sup> vs.<br><i>Baiap2l2</i> <sup>Δ16/Δ16</sup>   |                                                                            | P0.5   | 7G   |      |    |
|                          |                                                          | Row 1 <i>Baiap2l2</i> <sup>Δ16/Δ16</sup> | 0.68 | 0.07 | 15 |         |        |                                                                            |                                                                            | P3.5   | 7H   |      |    |
|                          |                                                          | Row 1 <i>Baiap2l2</i> <sup>Δ16/+</sup>   | 0.79 | 0.04 | 4  | 0.0326  |        | <i>Baiap2l2</i> <sup>Δ16/+</sup> vs.<br><i>Baiap2l2</i> <sup>Δ16/Δ16</sup> |                                                                            | P5.5   | 7I   |      |    |
|                          |                                                          | Row 1 <i>Baiap2l2</i> <sup>Δ16/Δ16</sup> | 0.87 | 0.07 | 12 |         |        |                                                                            |                                                                            | P8.5   | 7J   |      |    |
|                          |                                                          | Row 1 <i>Baiap2l2</i> <sup>+/+</sup>     | 0.64 | 0.03 | 9  | 0.2048  |        | <i>Baiap2l2</i> <sup>+/+</sup> vs.<br><i>Baiap2l2</i> <sup>Δ16/Δ16</sup>   |                                                                            | P14.5  | 7K   |      |    |
|                          |                                                          | Row 1 <i>Baiap2l2</i> <sup>Δ16/Δ16</sup> | 0.67 | 0.04 | 10 |         |        |                                                                            |                                                                            | P21    | 7L   |      |    |
|                          |                                                          | Row 2 <i>Baiap2l2</i> <sup>Δ16/+</sup>   | 0.32 | 0.04 | 42 | 0.0009  |        | <i>Baiap2l2</i> <sup>Δ16/+</sup> vs.<br><i>Baiap2l2</i> <sup>Δ16/Δ16</sup> |                                                                            | P0.5   | 7G   |      |    |
|                          |                                                          | Row 2 <i>Baiap2l2</i> <sup>Δ16/Δ16</sup> | 0.28 | 0.03 | 12 |         |        |                                                                            |                                                                            | P3.5   | 7H   |      |    |
|                          |                                                          | Row 2 <i>Baiap2l2</i> <sup>Δ16/+</sup>   | 0.57 | 0.06 | 15 | 0.3067  |        | <i>Baiap2l2</i> <sup>Δ16/+</sup> vs.<br><i>Baiap2l2</i> <sup>Δ16/Δ16</sup> |                                                                            | P5.5   | 7I   |      |    |
|                          |                                                          | Row 2 <i>Baiap2l2</i> <sup>Δ16/Δ16</sup> | 0.60 | 0.08 | 42 |         |        |                                                                            |                                                                            | P8.5   | 7J   |      |    |
|                          |                                                          | Row 2 <i>Baiap2l2</i> <sup>+/+</sup>     | 0.51 | 0.05 | 9  | 0.0136  |        | <i>Baiap2l2</i> <sup>+/+</sup> vs.<br><i>Baiap2l2</i> <sup>Δ16/Δ16</sup>   |                                                                            | P14.5  | 7K   |      |    |
|                          |                                                          | Row 2 <i>Baiap2l2</i> <sup>Δ16/Δ16</sup> | 0.60 | 0.09 | 16 |         |        |                                                                            |                                                                            | P21    | 7L   |      |    |
|                          |                                                          | Row 2 <i>Baiap2l2</i> <sup>+/+</sup>     | 0.67 | 0.07 | 13 | 0.0158  |        | <i>Baiap2l2</i> <sup>+/+</sup> vs.<br><i>Baiap2l2</i> <sup>Δ16/Δ16</sup>   |                                                                            | P0.5   | 7G   |      |    |
|                          |                                                          | Row 2 <i>Baiap2l2</i> <sup>Δ16/Δ16</sup> | 0.57 | 0.12 | 15 |         |        |                                                                            |                                                                            | P3.5   | 7H   |      |    |
|                          |                                                          | Row 2 <i>Baiap2l2</i> <sup>Δ16/+</sup>   | 0.59 | 0.11 | 4  | 0.0551  |        | <i>Baiap2l2</i> <sup>Δ16/+</sup> vs.<br><i>Baiap2l2</i> <sup>Δ16/Δ16</sup> |                                                                            | P5.5   | 7I   |      |    |
|                          |                                                          | Row 2 <i>Baiap2l2</i> <sup>Δ16/Δ16</sup> | 0.68 | 0.07 | 12 |         |        |                                                                            |                                                                            | P8.5   | 7J   |      |    |
|                          |                                                          | Row 2 <i>Baiap2l2</i> <sup>+/+</sup>     | 0.51 | 0.06 | 9  | 0.7722  |        | <i>Baiap2l2</i> <sup>+/+</sup> vs.<br><i>Baiap2l2</i> <sup>Δ16/Δ16</sup>   |                                                                            | P14.5  | 7K   |      |    |
|                          |                                                          | Row 2 <i>Baiap2l2</i> <sup>Δ16/Δ16</sup> | 0.52 | 0.06 | 10 |         |        |                                                                            |                                                                            | P21    | 7L   |      |    |
|                          |                                                          | Row 1 <i>Baiap2l2</i> <sup>+/+</sup>     | 2.73 | 0.30 | 13 | 0.0804  | μm     | <i>Baiap2l2</i> <sup>+/+</sup> vs.<br><i>Baiap2l2</i> <sup>Δ16/Δ16</sup>   | t-test                                                                     | P5.5   | 7M   |      |    |
|                          |                                                          | Row 1 <i>Baiap2l2</i> <sup>Δ16/Δ16</sup> | 2.88 | 0.19 | 23 |         |        |                                                                            |                                                                            |        |      |      |    |

The Journal of  
**Physiology** Statistical Summary Document

|                                          |                                          |      |      |        |                                                                       |                                                                         |                                                                       |                                                                       |                                                                       |                                                                         |        |                                                                         |        |                                                                       |        |                                                                       |        |                                                                       |        |                                                                         |        |       |        |       |    |
|------------------------------------------|------------------------------------------|------|------|--------|-----------------------------------------------------------------------|-------------------------------------------------------------------------|-----------------------------------------------------------------------|-----------------------------------------------------------------------|-----------------------------------------------------------------------|-------------------------------------------------------------------------|--------|-------------------------------------------------------------------------|--------|-----------------------------------------------------------------------|--------|-----------------------------------------------------------------------|--------|-----------------------------------------------------------------------|--------|-------------------------------------------------------------------------|--------|-------|--------|-------|----|
| 8. OHC stereocilia length                | Row 1 <i>Baiap2l2</i> <sup>Δ16/+</sup>   | 3.00 | 0.17 | 73     | 0.0289                                                                | <i>Baiap2l2</i> <sup>Δ16/+</sup> vs. <i>Baiap2l2</i> <sup>Δ16/Δ16</sup> | t-test                                                                | P8.5                                                                  | 7N                                                                    |                                                                         |        |                                                                         |        |                                                                       |        |                                                                       |        |                                                                       |        |                                                                         |        |       |        |       |    |
|                                          | Row 1 <i>Baiap2l2</i> <sup>Δ16/Δ16</sup> | 3.11 | 0.38 | 45     |                                                                       |                                                                         |                                                                       |                                                                       |                                                                       |                                                                         |        |                                                                         |        |                                                                       |        |                                                                       |        |                                                                       |        |                                                                         |        |       |        |       |    |
|                                          | Row 1 <i>Baiap2l2</i> <sup>+/+</sup>     | 2.84 | 0.20 | 31     | 0.0598                                                                |                                                                         | <i>Baiap2l2</i> <sup>+/+</sup> vs. <i>Baiap2l2</i> <sup>Δ16/Δ16</sup> | t-test                                                                | P14.5                                                                 | 7O                                                                      |        |                                                                         |        |                                                                       |        |                                                                       |        |                                                                       |        |                                                                         |        |       |        |       |    |
|                                          | Row 1 <i>Baiap2l2</i> <sup>Δ16/Δ16</sup> | 2.96 | 0.29 | 38     |                                                                       |                                                                         |                                                                       |                                                                       |                                                                       |                                                                         |        |                                                                         |        |                                                                       |        |                                                                       |        |                                                                       |        |                                                                         |        |       |        |       |    |
|                                          | Row 1 <i>Baiap2l2</i> <sup>+/+</sup>     | 3.16 | 1.14 | 12     | 0.8971                                                                |                                                                         |                                                                       | <i>Baiap2l2</i> <sup>+/+</sup> vs. <i>Baiap2l2</i> <sup>Δ16/Δ16</sup> | t-test                                                                | P21                                                                     | 7P     |                                                                         |        |                                                                       |        |                                                                       |        |                                                                       |        |                                                                         |        |       |        |       |    |
|                                          | Row 1 <i>Baiap2l2</i> <sup>Δ16/Δ16</sup> | 3.20 | 0.13 | 15     |                                                                       |                                                                         |                                                                       |                                                                       |                                                                       |                                                                         |        |                                                                         |        |                                                                       |        |                                                                       |        |                                                                       |        |                                                                         |        |       |        |       |    |
|                                          | Row 2 <i>Baiap2l2</i> <sup>+/+</sup>     | 2.12 | 0.27 | 13     | 0.0384                                                                |                                                                         |                                                                       |                                                                       |                                                                       | <i>Baiap2l2</i> <sup>+/+</sup> vs. <i>Baiap2l2</i> <sup>Δ16/Δ16</sup>   | t-test | P5.5                                                                    | 7M     |                                                                       |        |                                                                       |        |                                                                       |        |                                                                         |        |       |        |       |    |
|                                          | Row 2 <i>Baiap2l2</i> <sup>Δ16/Δ16</sup> | 2.32 | 0.27 | 23     |                                                                       |                                                                         |                                                                       |                                                                       |                                                                       |                                                                         |        |                                                                         |        |                                                                       |        |                                                                       |        |                                                                       |        |                                                                         |        |       |        |       |    |
|                                          | Row 2 <i>Baiap2l2</i> <sup>Δ16/+</sup>   | 1.90 | 0.22 | 73     | 0.0090                                                                |                                                                         |                                                                       |                                                                       |                                                                       |                                                                         |        | <i>Baiap2l2</i> <sup>Δ16/+</sup> vs. <i>Baiap2l2</i> <sup>Δ16/Δ16</sup> | t-test | P8.5                                                                  | 7N     |                                                                       |        |                                                                       |        |                                                                         |        |       |        |       |    |
|                                          | Row 2 <i>Baiap2l2</i> <sup>Δ16/Δ16</sup> | 1.79 | 0.23 | 45     |                                                                       |                                                                         |                                                                       |                                                                       |                                                                       |                                                                         |        |                                                                         |        |                                                                       |        |                                                                       |        |                                                                       |        |                                                                         |        |       |        |       |    |
|                                          | Row 2 <i>Baiap2l2</i> <sup>+/+</sup>     | 2.02 | 0.19 | 31     | 0.2298                                                                |                                                                         |                                                                       |                                                                       |                                                                       |                                                                         |        |                                                                         |        | <i>Baiap2l2</i> <sup>+/+</sup> vs. <i>Baiap2l2</i> <sup>Δ16/Δ16</sup> | t-test | P14.5                                                                 | 7O     |                                                                       |        |                                                                         |        |       |        |       |    |
|                                          | Row 2 <i>Baiap2l2</i> <sup>Δ16/Δ16</sup> | 1.96 | 0.21 | 38     |                                                                       |                                                                         |                                                                       |                                                                       |                                                                       |                                                                         |        |                                                                         |        |                                                                       |        |                                                                       |        |                                                                       |        |                                                                         |        |       |        |       |    |
|                                          | Row 2 <i>Baiap2l2</i> <sup>+/+</sup>     | 1.90 | 0.67 | 12     | 0.2183                                                                |                                                                         |                                                                       |                                                                       |                                                                       |                                                                         |        |                                                                         |        |                                                                       |        | <i>Baiap2l2</i> <sup>+/+</sup> vs. <i>Baiap2l2</i> <sup>Δ16/Δ16</sup> | t-test | P21                                                                   | 7P     |                                                                         |        |       |        |       |    |
|                                          | Row 2 <i>Baiap2l2</i> <sup>Δ16/Δ16</sup> | 2.12 | 0.16 | 15     |                                                                       |                                                                         |                                                                       |                                                                       |                                                                       |                                                                         |        |                                                                         |        |                                                                       |        |                                                                       |        |                                                                       |        |                                                                         |        |       |        |       |    |
|                                          | Row 3 <i>Baiap2l2</i> <sup>+/+</sup>     | 1.07 | 0.17 | 3      | 0.0814                                                                |                                                                         |                                                                       |                                                                       |                                                                       |                                                                         |        |                                                                         |        |                                                                       |        |                                                                       |        | <i>Baiap2l2</i> <sup>+/+</sup> vs. <i>Baiap2l2</i> <sup>Δ16/Δ16</sup> | t-test | P5.5                                                                    | 7M     |       |        |       |    |
|                                          | Row 3 <i>Baiap2l2</i> <sup>Δ16/Δ16</sup> | 1.32 | 0.21 | 10     |                                                                       |                                                                         |                                                                       |                                                                       |                                                                       |                                                                         |        |                                                                         |        |                                                                       |        |                                                                       |        |                                                                       |        |                                                                         |        |       |        |       |    |
|                                          | Row 3 <i>Baiap2l2</i> <sup>Δ16/+</sup>   | 1.25 | 0.15 | 64     | < 0.0001                                                              |                                                                         |                                                                       |                                                                       |                                                                       |                                                                         |        |                                                                         |        |                                                                       |        |                                                                       |        |                                                                       |        | <i>Baiap2l2</i> <sup>Δ16/+</sup> vs. <i>Baiap2l2</i> <sup>Δ16/Δ16</sup> | t-test | P8.5  | 7N     |       |    |
|                                          | Row 3 <i>Baiap2l2</i> <sup>Δ16/Δ16</sup> | 1.07 | 0.13 | 17     |                                                                       |                                                                         |                                                                       |                                                                       |                                                                       |                                                                         |        |                                                                         |        |                                                                       |        |                                                                       |        |                                                                       |        |                                                                         |        |       |        |       |    |
| Row 3 <i>Baiap2l2</i> <sup>+/+</sup>     | 1.28                                     | 0.20 | 22   | 0.2994 | <i>Baiap2l2</i> <sup>+/+</sup> vs. <i>Baiap2l2</i> <sup>Δ16/Δ16</sup> | t-test                                                                  |                                                                       |                                                                       |                                                                       |                                                                         |        |                                                                         |        |                                                                       |        |                                                                       |        |                                                                       |        |                                                                         |        | P14.5 | 7O     |       |    |
| Row 3 <i>Baiap2l2</i> <sup>Δ16/Δ16</sup> | 1.18                                     | 0.17 | 6    |        |                                                                       |                                                                         |                                                                       |                                                                       |                                                                       |                                                                         |        |                                                                         |        |                                                                       |        |                                                                       |        |                                                                       |        |                                                                         |        |       |        |       |    |
| Row 3 <i>Baiap2l2</i> <sup>+/+</sup>     | 0.98                                     | 0.25 | 9    | -      |                                                                       |                                                                         | <i>Baiap2l2</i> <sup>+/+</sup> vs. <i>Baiap2l2</i> <sup>Δ16/Δ16</sup> |                                                                       |                                                                       |                                                                         |        |                                                                         |        |                                                                       |        |                                                                       |        |                                                                       |        |                                                                         |        | -     | P21    | 7P    |    |
| Row 3 <i>Baiap2l2</i> <sup>Δ16/Δ16</sup> | 1.35                                     | N/A  | 1    |        |                                                                       |                                                                         |                                                                       |                                                                       |                                                                       |                                                                         |        |                                                                         |        |                                                                       |        |                                                                       |        |                                                                       |        |                                                                         |        |       |        |       |    |
| 9. OHC stereocilia width                 | Row 1 <i>Baiap2l2</i> <sup>+/+</sup>     | 0.32 | 0.03 | 13     |                                                                       |                                                                         |                                                                       | 0.0023                                                                | <i>Baiap2l2</i> <sup>+/+</sup> vs. <i>Baiap2l2</i> <sup>Δ16/Δ16</sup> |                                                                         |        |                                                                         |        |                                                                       |        |                                                                       |        |                                                                       |        |                                                                         |        |       | t-test | P5.5  | 7Q |
|                                          | Row 1 <i>Baiap2l2</i> <sup>Δ16/Δ16</sup> | 0.28 | 0.03 | 23     |                                                                       |                                                                         |                                                                       |                                                                       |                                                                       |                                                                         |        |                                                                         |        |                                                                       |        |                                                                       |        |                                                                       |        |                                                                         |        |       |        |       |    |
|                                          | Row 1 <i>Baiap2l2</i> <sup>Δ16/+</sup>   | 0.35 | 0.03 | 73     |                                                                       |                                                                         |                                                                       | < 0.0001                                                              |                                                                       | <i>Baiap2l2</i> <sup>Δ16/+</sup> vs. <i>Baiap2l2</i> <sup>Δ16/Δ16</sup> | t-test |                                                                         |        |                                                                       |        |                                                                       |        |                                                                       |        |                                                                         |        |       |        | P8.5  | 7R |
|                                          | Row 1 <i>Baiap2l2</i> <sup>Δ16/Δ16</sup> | 0.38 | 0.04 | 45     |                                                                       |                                                                         |                                                                       |                                                                       |                                                                       |                                                                         |        |                                                                         |        |                                                                       |        |                                                                       |        |                                                                       |        |                                                                         |        |       |        |       |    |
|                                          | Row 1 <i>Baiap2l2</i> <sup>+/+</sup>     | 0.34 | 0.04 | 31     |                                                                       |                                                                         |                                                                       | 0.2820                                                                |                                                                       |                                                                         |        | <i>Baiap2l2</i> <sup>+/+</sup> vs. <i>Baiap2l2</i> <sup>Δ16/Δ16</sup>   | t-test |                                                                       |        |                                                                       |        |                                                                       |        |                                                                         |        |       |        | P14.5 | 7S |
|                                          | Row 1 <i>Baiap2l2</i> <sup>Δ16/Δ16</sup> | 0.35 | 0.04 | 38     |                                                                       |                                                                         |                                                                       |                                                                       |                                                                       |                                                                         |        |                                                                         |        |                                                                       |        |                                                                       |        |                                                                       |        |                                                                         |        |       |        |       |    |
|                                          | Row 1 <i>Baiap2l2</i> <sup>+/+</sup>     | 0.30 | 0.03 | 12     |                                                                       |                                                                         |                                                                       | 0.7075                                                                |                                                                       |                                                                         |        |                                                                         |        | <i>Baiap2l2</i> <sup>+/+</sup> vs. <i>Baiap2l2</i> <sup>Δ16/Δ16</sup> | t-test |                                                                       |        |                                                                       |        |                                                                         |        |       |        | P21   | 7T |
| Row 1 <i>Baiap2l2</i> <sup>Δ16/Δ16</sup> | 0.30                                     | 0.04 | 15   |        |                                                                       |                                                                         |                                                                       |                                                                       |                                                                       |                                                                         |        |                                                                         |        |                                                                       |        |                                                                       |        |                                                                       |        |                                                                         |        |       |        |       |    |

The Journal of  
**Physiology** Statistical Summary Document

|                                        |                                                                          |                                          |       |       |    |          |    |                                                                               |        |       |    |  |
|----------------------------------------|--------------------------------------------------------------------------|------------------------------------------|-------|-------|----|----------|----|-------------------------------------------------------------------------------|--------|-------|----|--|
|                                        |                                                                          | Row 2 <i>Baiap2l2</i> <sup>+/+</sup>     | 0.40  | 0.06  | 13 | 0.1253   |    | <i>Baiap2l2</i> <sup>+/+</sup> vs.<br><i>Baiap2l2</i> <sup>Δ16/Δ16</sup>      |        | P5.5  | 7Q |  |
|                                        |                                                                          | Row 2 <i>Baiap2l2</i> <sup>Δ16/Δ16</sup> | 0.38  | 0.03  | 23 |          |    |                                                                               |        |       |    |  |
|                                        |                                                                          | Row 2 <i>Baiap2l2</i> <sup>Δ16/+</sup>   | 0.37  | 0.03  | 73 | 0.0214   |    | <i>Baiap2l2</i> <sup>Δ16/+</sup> vs.<br><i>Baiap2l2</i> <sup>Δ16/Δ16</sup>    |        | P8.5  | 7R |  |
|                                        |                                                                          | Row 2 <i>Baiap2l2</i> <sup>Δ16/Δ16</sup> | 0.38  | 0.04  | 45 |          |    |                                                                               |        |       |    |  |
|                                        |                                                                          | Row 2 <i>Baiap2l2</i> <sup>+/+</sup>     | 0.41  | 0.04  | 31 | 0.8592   |    | <i>Baiap2l2</i> <sup>+/+</sup> vs.<br><i>Baiap2l2</i> <sup>Δ16/Δ16</sup>      |        | P14.5 | 7S |  |
|                                        |                                                                          | Row 2 <i>Baiap2l2</i> <sup>Δ16/Δ16</sup> | 0.41  | 0.04  | 38 |          |    |                                                                               |        |       |    |  |
|                                        |                                                                          | Row 2 <i>Baiap2l2</i> <sup>+/+</sup>     | 0.36  | 0.02  | 12 | 0.0094   |    | <i>Baiap2l2</i> <sup>+/+</sup> vs.<br><i>Baiap2l2</i> <sup>Δ16/Δ16</sup>      |        | P21   | 7T |  |
|                                        |                                                                          | Row 2 <i>Baiap2l2</i> <sup>Δ16/Δ16</sup> | 0.32  | 0.04  | 15 |          |    |                                                                               |        |       |    |  |
|                                        |                                                                          | Row 3 <i>Baiap2l2</i> <sup>+/+</sup>     | 0.27  | 0.10  | 3  | 0.1143   |    | <i>Baiap2l2</i> <sup>+/+</sup> vs.<br><i>Baiap2l2</i> <sup>Δ16/Δ16</sup>      |        | P5.5  | 7Q |  |
|                                        |                                                                          | Row 3 <i>Baiap2l2</i> <sup>Δ16/Δ16</sup> | 0.21  | 0.04  | 10 |          |    |                                                                               |        |       |    |  |
|                                        |                                                                          | Row 3 <i>Baiap2l2</i> <sup>Δ16/+</sup>   | 0.29  | 0.04  | 64 | 0.4959   |    | <i>Baiap2l2</i> <sup>Δ16/+</sup> vs.<br><i>Baiap2l2</i> <sup>Δ16/Δ16</sup>    |        | P8.5  | 7R |  |
|                                        |                                                                          | Row 3 <i>Baiap2l2</i> <sup>Δ16/Δ16</sup> | 0.28  | 0.05  | 17 |          |    |                                                                               |        |       |    |  |
|                                        |                                                                          | Row 3 <i>Baiap2l2</i> <sup>+/+</sup>     | 0.34  | 0.05  | 22 | 0.0470   |    | <i>Baiap2l2</i> <sup>+/+</sup> vs.<br><i>Baiap2l2</i> <sup>Δ16/Δ16</sup>      |        | P14.5 | 7S |  |
|                                        |                                                                          | Row 3 <i>Baiap2l2</i> <sup>Δ16/Δ16</sup> | 0.30  | 0.03  | 6  |          |    |                                                                               |        |       |    |  |
|                                        |                                                                          | Row 3 <i>Baiap2l2</i> <sup>+/+</sup>     | 0.26  | 0.06  | 9  | -        |    | -                                                                             |        | P21   | 7T |  |
|                                        |                                                                          | Row 3 <i>Baiap2l2</i> <sup>Δ16/Δ16</sup> | 0.20  | N/A   | 1  |          |    |                                                                               |        |       |    |  |
| 10. OHC maximal MET current at -124 mV | MET currents were smaller in <i>Baiap2l2</i> <sup>tm1b/tm1b</sup> at P11 | <i>Baiap2l2</i> <sup>tm1b/+</sup>        | -915  | 145   | 11 | 0.1711   | pA | <i>Baiap2l2</i> <sup>tm1b/tm1b</sup> vs.<br><i>Baiap2l2</i> <sup>tm1b/+</sup> | t-test | P8-9  | 8G |  |
|                                        |                                                                          | <i>Baiap2l2</i> <sup>tm1b/tm1b</sup>     | -767  | 327   | 17 |          |    |                                                                               |        |       |    |  |
|                                        |                                                                          | <i>Baiap2l2</i> <sup>tm1b/+</sup>        | -1200 | 317   | 6  | 0.0036   |    | <i>Baiap2l2</i> <sup>tm1b/tm1b</sup> vs.<br><i>Baiap2l2</i> <sup>tm1b/+</sup> |        | P11   |    |  |
|                                        |                                                                          | <i>Baiap2l2</i> <sup>tm1b/tm1b</sup>     | -511  | 131   | 4  |          |    |                                                                               |        |       |    |  |
| 11. OHC maximal MET current at +96 mV  | MET currents were smaller in <i>Baiap2l2</i> <sup>tm1b/tm1b</sup> at P11 | <i>Baiap2l2</i> <sup>tm1b/+</sup>        | 955   | 206   | 11 | 0.2020   | pA | <i>Baiap2l2</i> <sup>tm1b/tm1b</sup> vs.<br><i>Baiap2l2</i> <sup>tm1b/+</sup> | t-test | P8-9  | 8H |  |
|                                        |                                                                          | <i>Baiap2l2</i> <sup>tm1b/tm1b</sup>     | 805   | 337   | 16 |          |    |                                                                               |        |       |    |  |
|                                        |                                                                          | <i>Baiap2l2</i> <sup>tm1b/+</sup>        | 1484  | 205   | 5  | < 0.0001 |    | <i>Baiap2l2</i> <sup>tm1b/tm1b</sup> vs.<br><i>Baiap2l2</i> <sup>tm1b/+</sup> |        | P11   |    |  |
|                                        |                                                                          | <i>Baiap2l2</i> <sup>tm1b/tm1b</sup>     | 579   | 79    | 4  |          |    |                                                                               |        |       |    |  |
| 12. OHC MET                            | No difference                                                            | <i>Baiap2l2</i> <sup>tm1b/+</sup>        | 0.065 | 0.028 | 11 | 0.1035   |    | <i>Baiap2l2</i> <sup>tm1b/tm1b</sup> vs.<br><i>Baiap2l2</i> <sup>tm1b/+</sup> | t-test | P8-9  | 8I |  |
|                                        |                                                                          | <i>Baiap2l2</i> <sup>tm1b/tm1b</sup>     | 0.113 | 0.090 | 17 |          |    |                                                                               |        |       |    |  |

# The Journal of Physiology

## Statistical Summary Document

|                                                                     |                                                                                   |                                               |       |       |    |        |    |                                                                          |        |         |                                                                          |  |        |        |                 |
|---------------------------------------------------------------------|-----------------------------------------------------------------------------------|-----------------------------------------------|-------|-------|----|--------|----|--------------------------------------------------------------------------|--------|---------|--------------------------------------------------------------------------|--|--------|--------|-----------------|
| channel open probability at -124 mV                                 | between <i>Baiap2l2<sup>tm1b/tm1b</sup></i> and control.                          | <i>Baiap2l2<sup>tm1b/+</sup></i>              | 0.085 | 0.017 | 6  | 0.1950 |    | <i>Baiap2l2<sup>tm1b/tm1b</sup></i> vs. <i>Baiap2l2<sup>tm1b/+</sup></i> |        | P11     |                                                                          |  |        |        |                 |
|                                                                     |                                                                                   | <i>Baiap2l2<sup>tm1b/tm1b</sup></i>           | 0.122 | 0.063 | 4  |        |    |                                                                          |        |         |                                                                          |  |        |        |                 |
| 13. OHC MET channel open probability at +96 mV                      | No difference between <i>Baiap2l2<sup>tm1b/tm1b</sup></i> and control.            | <i>Baiap2l2<sup>tm1b/+</sup></i>              | 0.394 | 0.119 | 11 | 0.0680 |    | <i>Baiap2l2<sup>tm1b/tm1b</sup></i> vs. <i>Baiap2l2<sup>tm1b/+</sup></i> | t-test | P8-9    | 8J                                                                       |  |        |        |                 |
|                                                                     |                                                                                   | <i>Baiap2l2<sup>tm1b/tm1b</sup></i>           | 0.472 | 0.094 | 16 |        |    |                                                                          |        |         |                                                                          |  |        |        |                 |
|                                                                     |                                                                                   | <i>Baiap2l2<sup>tm1b/+</sup></i>              | 0.360 | 0.063 | 5  | 0.4225 |    | <i>Baiap2l2<sup>tm1b/tm1b</sup></i> vs. <i>Baiap2l2<sup>tm1b/+</sup></i> |        | P11     |                                                                          |  |        |        |                 |
|                                                                     |                                                                                   | <i>Baiap2l2<sup>tm1b/tm1b</sup></i>           | 0.398 | 0.071 | 4  |        |    |                                                                          |        |         |                                                                          |  |        |        |                 |
| 14. Uptake of FM1-43 by OHCs                                        | FM1-43 uptake is highly reduced in OHCs from <i>Baiap2l2<sup>Δ16/+</sup></i> mice | No BAPTA <i>Baiap2l2<sup>Δ16/+</sup></i>      | 100.0 | 11.9  | 24 | 0.0001 | %  | <i>Baiap2l2<sup>tm1b/tm1b</sup></i> vs. <i>Baiap2l2<sup>tm1b/+</sup></i> | t-test |         | 8M                                                                       |  |        |        |                 |
|                                                                     |                                                                                   | No BAPTA <i>Baiap2l2<sup>Δ16/Δ16</sup></i>    | 66.4  | 15.8  | 36 |        |    |                                                                          |        |         |                                                                          |  |        |        |                 |
|                                                                     |                                                                                   | 5 mM BAPTA <i>Baiap2l2<sup>Δ16/+</sup></i>    | 45.6  | 11.5  | 24 | 0.0001 |    |                                                                          |        |         |                                                                          |  |        |        |                 |
|                                                                     |                                                                                   | 5 mM BAPTA <i>Baiap2l2<sup>Δ16/Δ16</sup></i>  | 37.4  | 6.1   | 24 |        |    |                                                                          |        |         |                                                                          |  |        |        |                 |
| 15. Size and Po of the MET current in adult IHCs                    | No difference between <i>Baiap2l2<sup>tm1b/tm1b</sup></i> and control.            | <i>Baiap2l2<sup>tm1b/+</sup></i>              | -358  | 96    | 16 | 0.286  | pA | <i>Baiap2l2<sup>tm1b/tm1b</sup></i> vs. <i>Baiap2l2<sup>tm1b/+</sup></i> | t-test | P19-P28 | 8O left panel                                                            |  |        |        |                 |
|                                                                     |                                                                                   | <i>Baiap2l2<sup>tm1b/tm1b</sup></i>           | -317  | 84    | 12 |        |    |                                                                          |        |         |                                                                          |  |        |        |                 |
|                                                                     |                                                                                   | <i>Baiap2l2<sup>tm1b/+</sup></i>              | 0.023 | 0.008 | 16 | 0.3229 |    |                                                                          |        |         | 8O right panel                                                           |  |        |        |                 |
|                                                                     |                                                                                   | <i>Baiap2l2<sup>tm1b/tm1b</sup></i>           | 0.026 | 0.006 | 12 |        |    |                                                                          |        |         |                                                                          |  |        |        |                 |
| 16. IHC $I_K$ at 0 mV, $I_{K,f}$ at -25 mV and $I_{K,n}$ at -124 mV | No difference between <i>Baiap2l2<sup>tm1b/tm1b</sup></i> and control.            | <i>Baiap2l2<sup>tm1b/+</sup></i> $I_K$        | 10.06 | 3.10  | 7  | 0.3001 | nA | <i>Baiap2l2<sup>tm1b/tm1b</sup></i> vs. <i>Baiap2l2<sup>tm1b/+</sup></i> | t-test | P28-38  | 9E, left panel                                                           |  |        |        |                 |
|                                                                     |                                                                                   | <i>Baiap2l2<sup>tm1b/tm1b</sup></i> $I_K$     | 11.49 | 1.99  | 8  |        |    |                                                                          |        |         |                                                                          |  |        |        |                 |
|                                                                     |                                                                                   | <i>Baiap2l2<sup>tm1b/+</sup></i> $I_{K,f}$    | 1.29  | 0.21  | 7  | 0.1312 | nA |                                                                          |        |         | <i>Baiap2l2<sup>tm1b/tm1b</sup></i> vs. <i>Baiap2l2<sup>tm1b/+</sup></i> |  | t-test | P28-38 | 9E, right panel |
|                                                                     |                                                                                   | <i>Baiap2l2<sup>tm1b/tm1b</sup></i> $I_{K,f}$ | 1.53  | 0.35  | 8  |        |    |                                                                          |        |         |                                                                          |  |        |        |                 |
|                                                                     |                                                                                   | <i>Baiap2l2<sup>tm1b/+</sup></i> $I_{K,n}$    | 0.245 | 0.052 | 6  | 0.8122 | nA |                                                                          |        |         |                                                                          |  |        |        | t-test          |

The Journal of  
**Physiology** Statistical Summary Document

|                              |                                                                        |                                               |       |       |   |        |    |                                                                          |        |        |     |  |
|------------------------------|------------------------------------------------------------------------|-----------------------------------------------|-------|-------|---|--------|----|--------------------------------------------------------------------------|--------|--------|-----|--|
|                              | <i>b/tm1b</i> and control.                                             | <i>Baiap2l2<sup>tm1b/tm1b</sup></i> $I_{K,n}$ | 0.235 | 0.097 | 7 |        |    | <i>Baiap2l2<sup>tm1b/tm1b</sup></i> vs. <i>Baiap2l2<sup>tm1b/+</sup></i> |        |        |     |  |
|                              |                                                                        | <i>Baiap2l2<sup>tm1b/tm1b</sup></i> <i>Cm</i> | 12.2  | 2.9   | 8 |        |    |                                                                          |        |        |     |  |
| 17. OHC $I_{K,n}$ at -124 mV | No difference between <i>Baiap2l2<sup>tm1b/tm1b</sup></i> and control. | <i>Baiap2l2<sup>tm1b/+</sup></i> $I_{K,n}$    | 0.440 | 0.051 | 3 | 0.4592 | nA | <i>Baiap2l2<sup>tm1b/tm1b</sup></i> vs. <i>Baiap2l2<sup>tm1b/+</sup></i> | t-test | P12    | 10C |  |
|                              |                                                                        | <i>Baiap2l2<sup>tm1b/tm1b</sup></i> $I_{K,n}$ | 0.410 | 0.037 | 3 |        |    |                                                                          |        |        |     |  |
|                              |                                                                        | <i>Baiap2l2<sup>tm1b/+</sup></i> $I_{K,n}$    | 0.857 | 0.220 | 8 | 0.1022 | nA | <i>Baiap2l2<sup>tm1b/tm1b</sup></i> vs. <i>Baiap2l2<sup>tm1b/+</sup></i> | t-test | P29-40 | 10F |  |
|                              |                                                                        | <i>Baiap2l2<sup>tm1b/tm1b</sup></i> $I_{K,n}$ | 0.671 | 0.150 | 6 |        |    |                                                                          |        |        |     |  |
